# Supplementary material for: Nanocomposites based on Cu2O coated silver nanowire networks for high-performance oxygen evolution reaction
Source: Royal Society of Chemistry journal article supplement (doi:10.1039/d4na00364k), 2024-01-01
Supplement: d4na00364k1.pdf [file d4na00364k1.pdf]

## Electronic Supplementary Information

### Nanocomposites based on Cu<sub>2</sub>O coated silver nanowire networks for high-performance oxygen evolution reaction

Sergio Battiato<sup>a,b</sup>, Abderrahime Sekkat<sup>c,d</sup>, Camilo Sanchez Velasquez<sup>c</sup>, Anna Lucia Pellegrino<sup>e</sup>, Daniel Bellet<sup>c</sup>, Antonio Terrasi<sup>a,b</sup>, Salvo Mirabella<sup>a,b</sup>, and David Muñoz-Rojas<sup>c\*</sup>

<sup>a</sup> Dipartimento di Fisica e Astronomia “Ettore Majorana”, Università di Catania, Via Santa Sofia 64, 95123 Catania, Italy

<sup>b</sup> CNR-IMM, Via Santa Sofia 64, 95123 Catania, Italy

<sup>c</sup> Univ. Grenoble Alpes, CNRS, Grenoble INP, LMGP, Grenoble, France

<sup>d</sup> Laboratoire de Génie Chimique, Université de Toulouse, CNRS, Toulouse, France

<sup>e</sup> Dipartimento di Scienze Chimiche, Università di Catania, INSTM UdR Catania, Viale Andrea Doria 6, I-95125 Catania, Italy

\*Corresponding author, Email: [david.munoz-rojas@grenoble-inp.fr](mailto:david.munoz-rojas@grenoble-inp.fr)

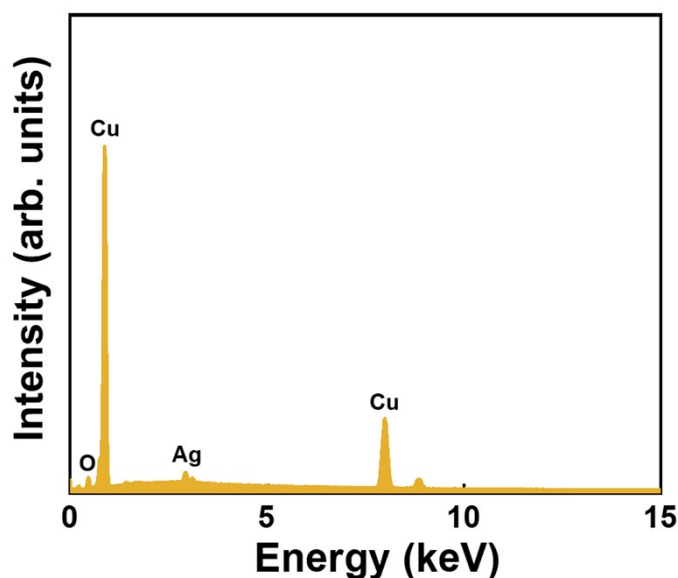

Fig. S1. EDS spectrum of AgNWs@Cu<sub>2</sub>O100 nm.

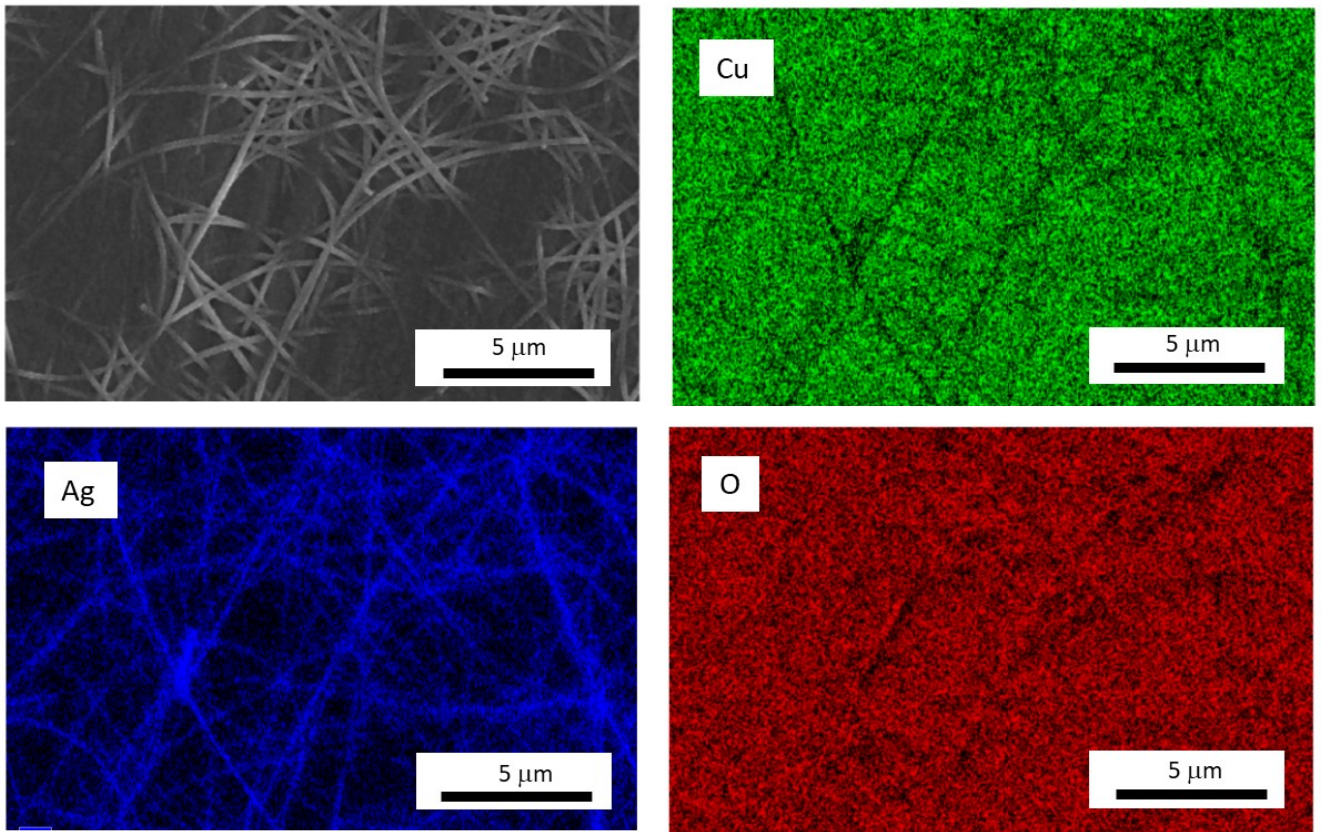

**Fig. S2.** SEM image and the corresponding elemental maps of AgNWs@Cu<sub>2</sub>O100 nm.

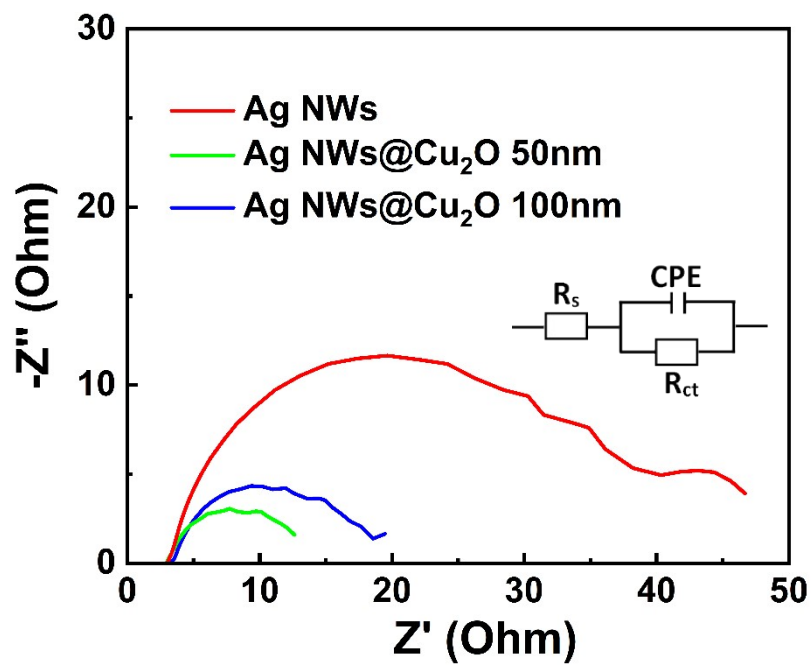

**Fig. S3.** Nyquist plots of various coatings deposited on Cu sheet in 1 M KOH. Inset shows the Randles equivalent circuit used for fitting the experimental data.

## TOF calculation

The TOF is defined as the rate of production of oxygen molecules per available (and active) site:

$$\text{TOF} = j / 4nF$$

where  $j$  is the measured current density at a certain overpotential during the LSV measurements in 1 M KOH,  $A$  is the geometric area of the electrode,  $n$  is the number of active sites, and  $F$  is the Faraday constant ( $96,485 \text{ C mol}^{-1}$ )

## Active Site Calculation [1-3]

The value of  $n$  can be calculated by CV measurements, carried out in PBS electrolyte (pH 7) from  $-0.2$  to  $0.6 \text{ V}$  versus RHE, being the integrated charge over the whole potential range proportional to the total number of active sites.

The  $n$  is calculated according to the formula

$$n = \frac{Q}{2F} = \frac{it}{2F} = \frac{i \frac{V}{v}}{2F} = \frac{S}{2Fv}$$

where  $S$  is the area obtained by integrating the CV curve,  $F$  is the Faradaic constant ( $96,485 \text{ C mol}^{-1}$ ),  $I$  is the current density ( $\text{A m}^{-2}$ ),  $V$  is the voltage ( $\text{V}$ ), and  $v$  is the scanning rate ( $\text{V s}^{-1}$ ).

## Calculation of $C_{dl}$ and ECSA

The double layer capacitance ( $C_{dl}$ ) was evaluated by cyclic voltammetry in non-Faradaic potential range  $1.19$ - $1.29 \text{ V}$  vs. RHE at various scan rates (from  $20$  to  $140 \text{ mV s}^{-1}$ ). Plotting the capacitive current density ( $|j_a - j_c|$ ) determined at  $1.24 \text{ V}$  vs. the scan rate ( $v$ ) yielded a straight line with a slope equal to twice the  $C_{dl}$ . The  $C_{dl}$  value can be then correlated with the ECSA, according to the expression [4]:

$$\text{ECSA} = C_{dl}/C_s$$

where  $C_s$  is the specific capacitance of the material or the capacitance of an atomically smooth planar surface of the material per unit area under identical electrolyte conditions. Here, we adopt a general specific capacitance of  $0.04 \text{ mF cm}^{-2}$ , typical value reported for a metal electrode in 1 M KOH solution [5].

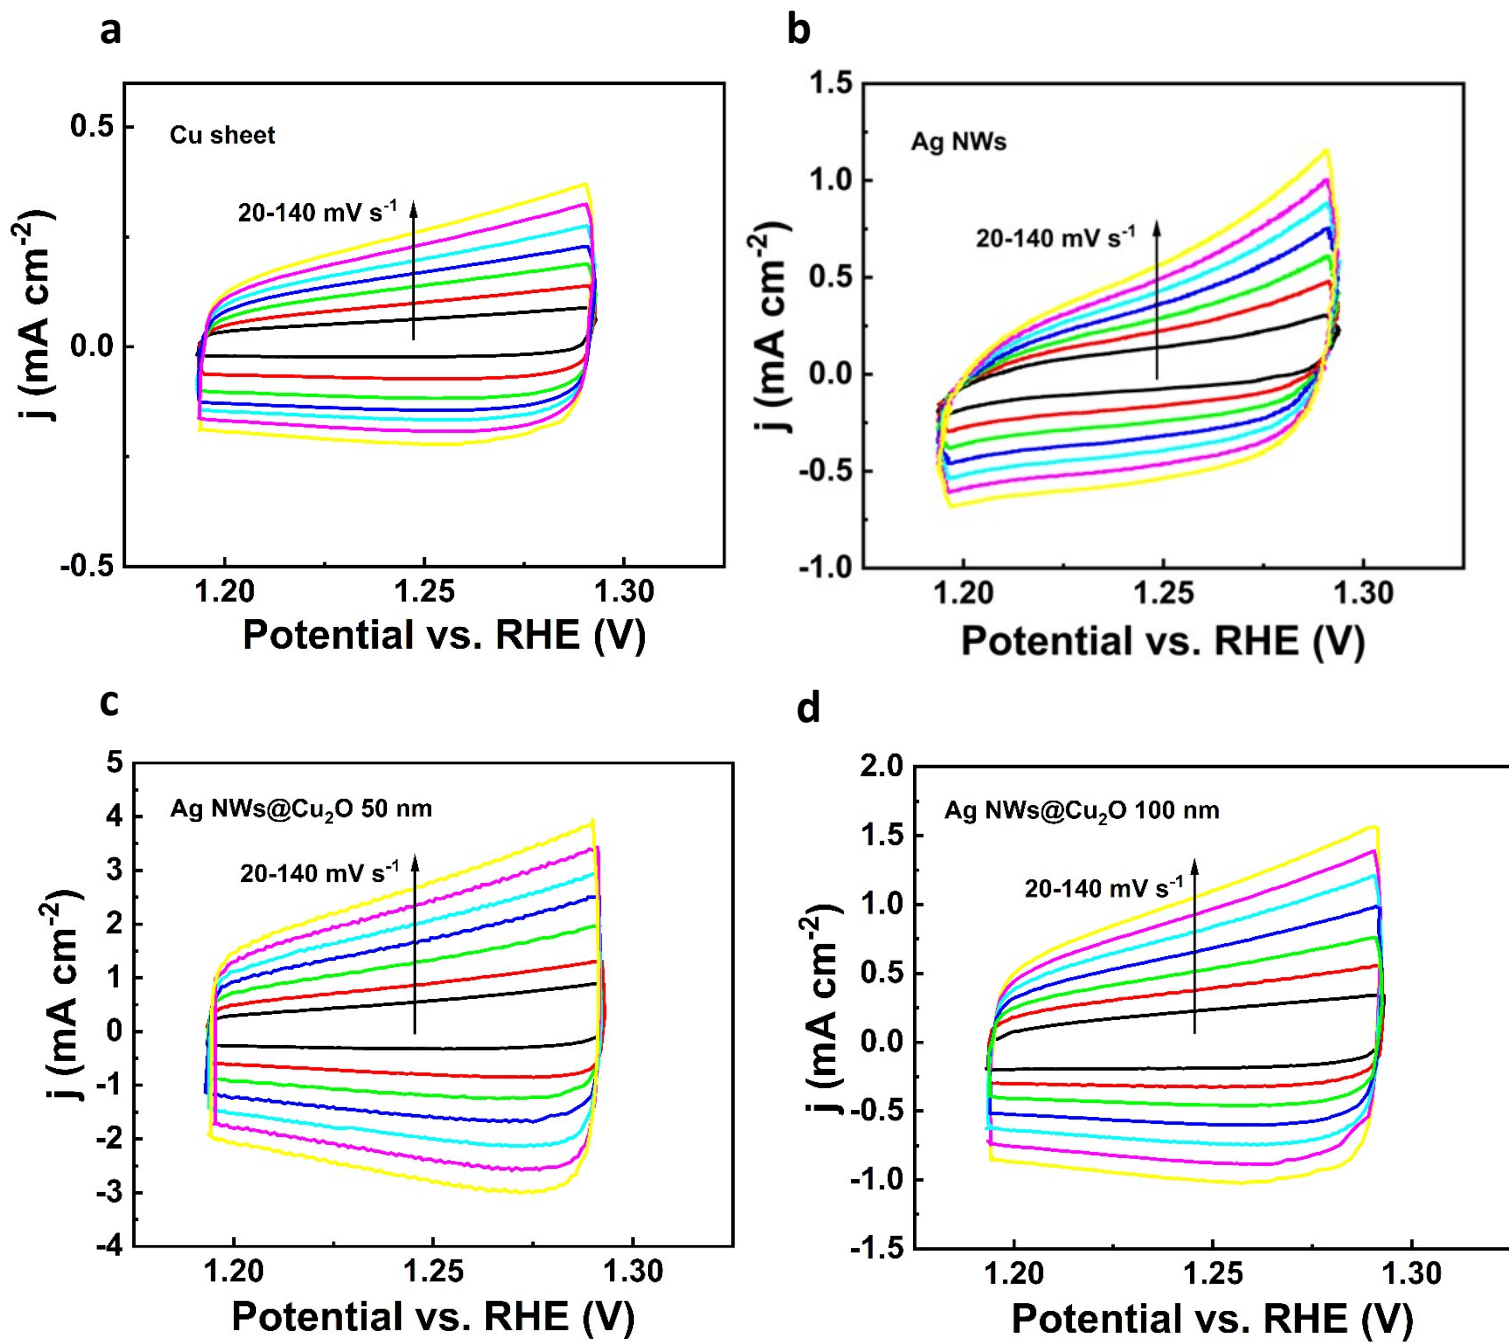

**Fig. S4.** CV curves in the non-faradaic region of 1.19-1.29 V vs. RHE of (a) Cu sheet, (b) Ag NWs, (c) Ag NWs@Cu<sub>2</sub>O 50 nm, and (d) Ag NWs/Cu<sub>2</sub>O 100 nm with various scan rates (20-140  $\text{mV s}^{-1}$ ).

## References

- [1] Tian, J.; Liu, Q.; Asiri, A. M.; Sun, X. Self-Supported Nanoporous Cobalt Phosphide Nanowire Arrays: An Efficient 3D Hydrogen-Evolving Cathode over the Wide Range of pH 0–14. *J. Am. Chem. Soc.* 2014, 136, 7587–7590.
- [2] Zeng, L.; Sun, K.; Wang, X.; Liu, Y.; Pan, Y.; Liu, Z.; Cao, D.; Song, Y.; Liu, S.; Liu, C. Three-dimensional-networked Ni<sub>2</sub>P/Ni<sub>3</sub>S<sub>2</sub> heteronanoflake arrays for highly enhanced electrochemical overall-water-splitting activity. *Nano Energy* 2018, 51, 26–36.
- [3] Ren, X.; Wu, D.; Ge, R.; Sun, X.; Ma, H.; Yan, T.; Zhang, Y.; Du, B.; Wei, Q.; Chen, L. Self-supported CoMoS<sub>4</sub> nanosheet array as an efficient catalyst for hydrogen evolution at neutral pH. *Nano Res.* 2018, 11, 2024–2033.
- [4] C.C.L. McCrory, S. Jung, I.M. Ferrer, S.M. Chatman, J.C. Peters, T.F. Jaramillo, Benchmarking hydrogen evolving reaction and oxygen evolving reaction electrocatalysts for solar water splitting devices. *J. Am. Chem. Soc.* 137 (2015) 4347–4357.
- [5] A.T.A. Ahmed, B. Hou, H.S. Chavan, Y. Jo, S. Cho, J. Kim, S.M. Pawar, S. Cha, A.I. Inamdar, H. Kim, H. Im, Self-assembled nanostructured CuCo<sub>2</sub>O<sub>4</sub> for electrochemical energy storage and the oxygen evolution reaction via morphology engineering, *Small* 14 (2018) 18
