# Supplementary figures and images for: Nanocomposites based on Cu2O coated silver nanowire networks for high-performance oxygen evolution reaction
Source: Royal Society of Chemistry journal article supplement (doi:10.1039/d4na00364k), 2024-01-01

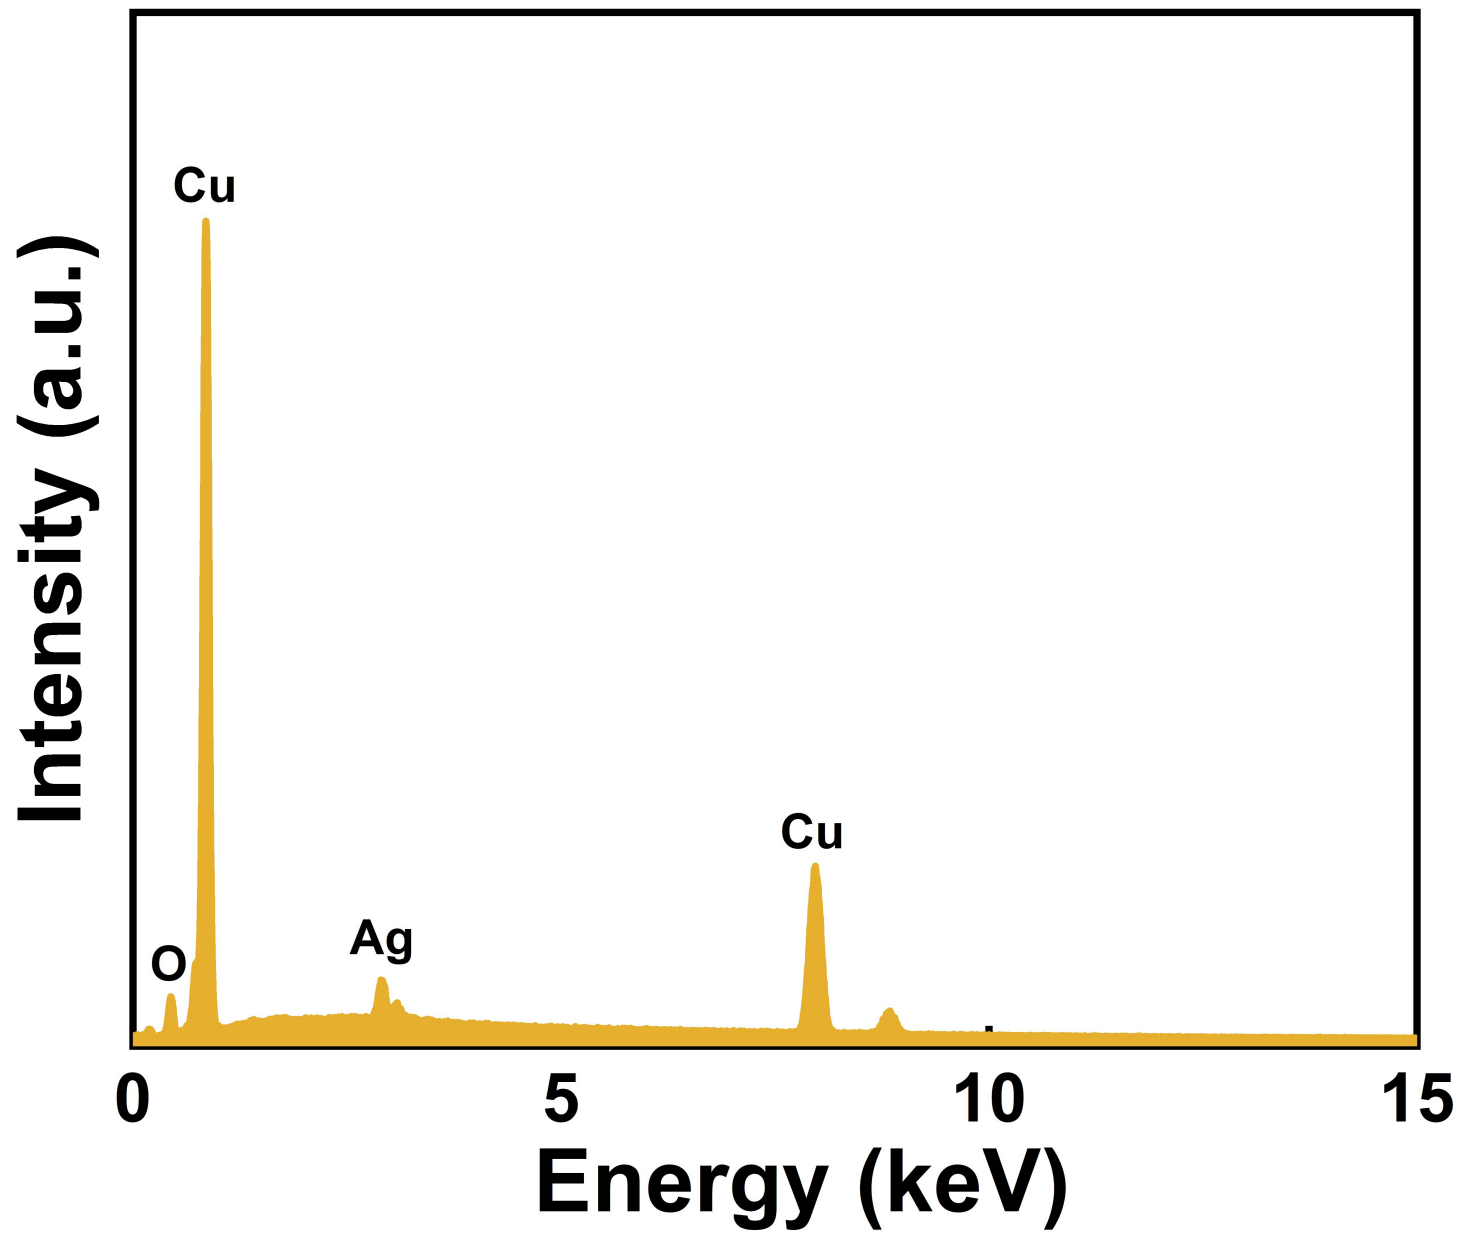

Supplement: d4na00364k3.pdf [file d4na00364k3.pdf]

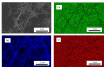

Supplement: d4na00364k4.pdf [file d4na00364k4.pdf]

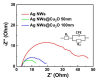

Supplement: d4na00364k5.pdf [file d4na00364k5.pdf]

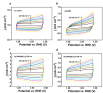

Supplement: d4na00364k6.pdf [file d4na00364k6.pdf]
